# Supplementary material
Source: Preprints.org preprint supplement (doi:10.20944/preprints202102.0610.v2)
Supplement: Supplementary file 2 [file supplementary]

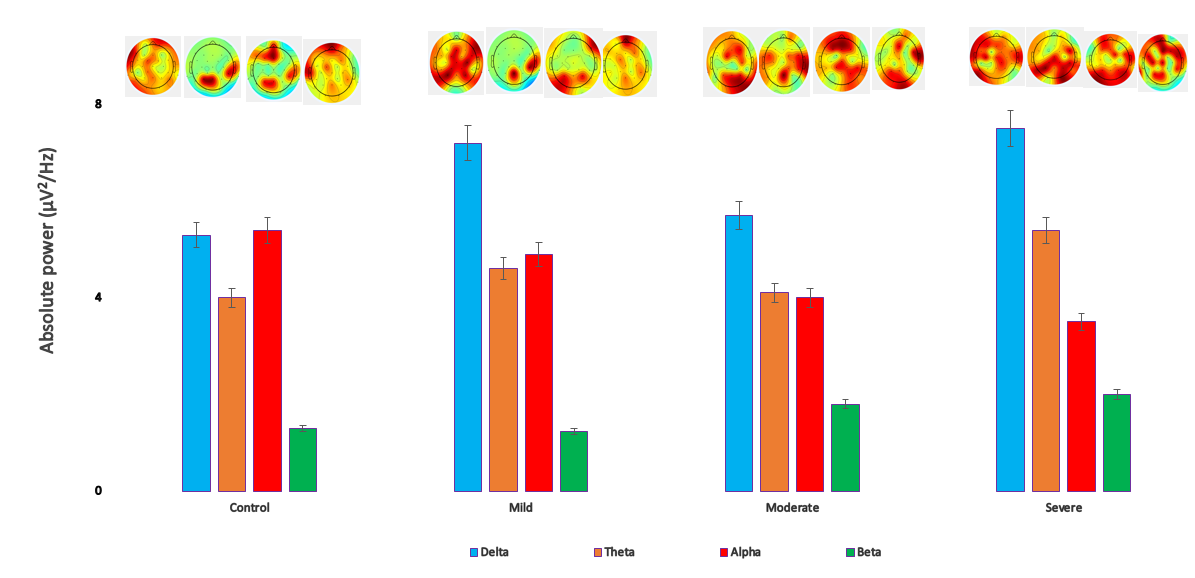


**Figure A**. The distribution of the average absolute power for all SAD groups in different frequency bands.


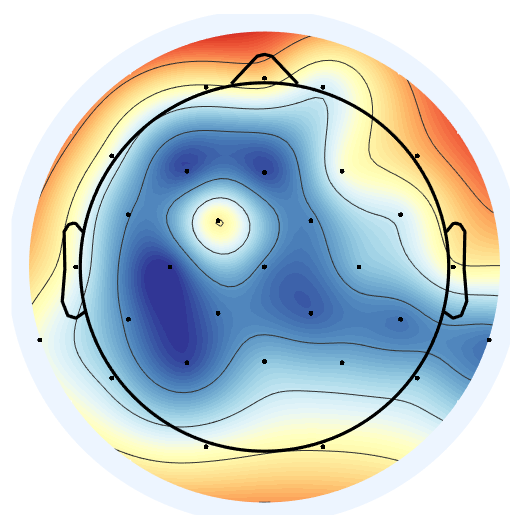

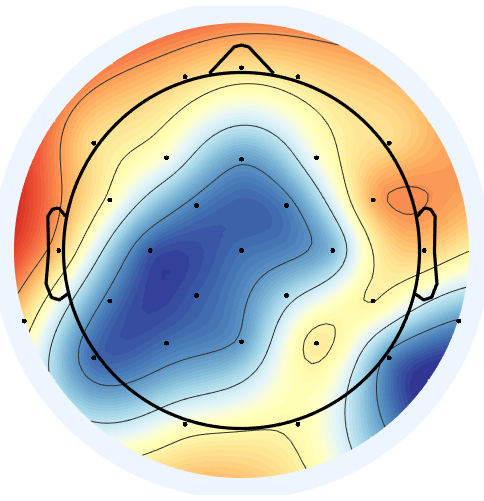

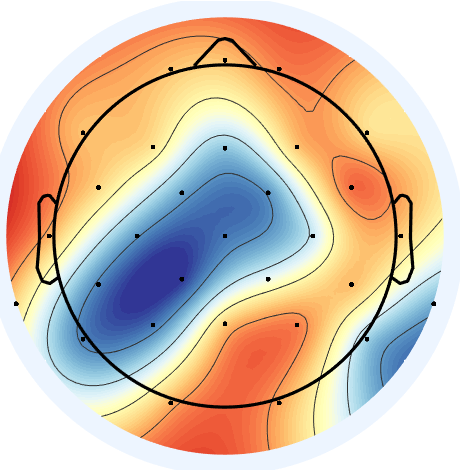

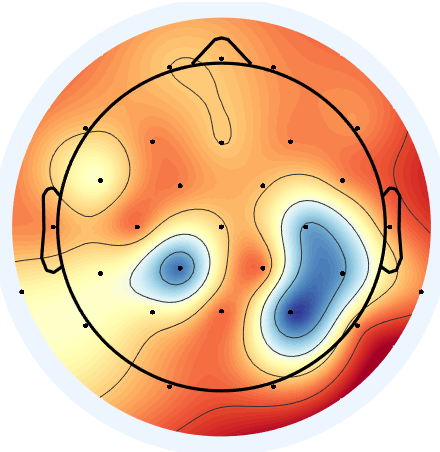

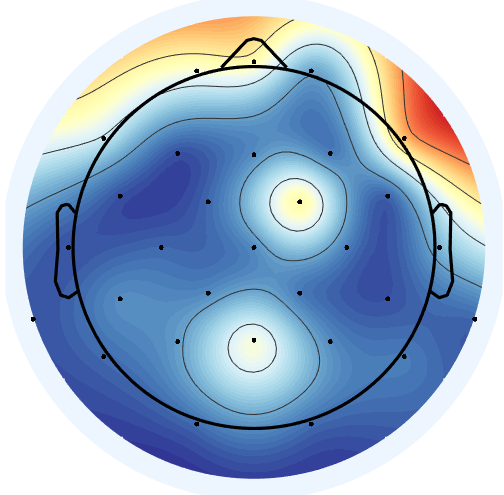

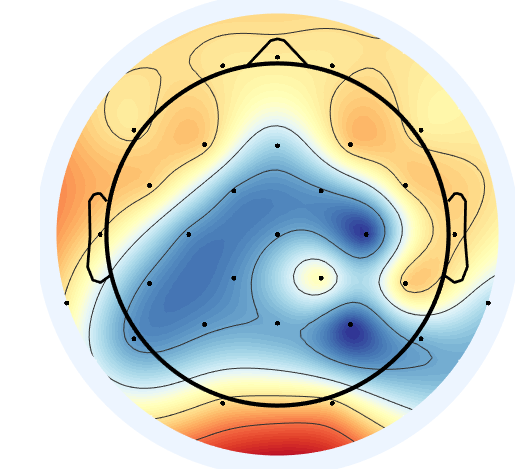

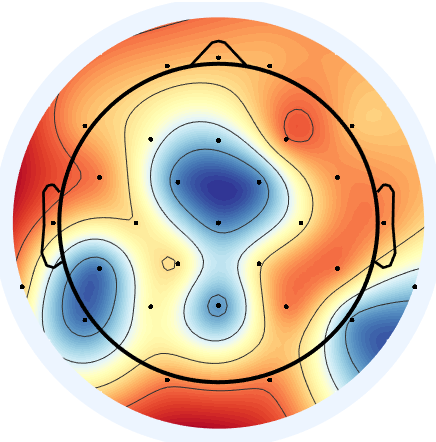

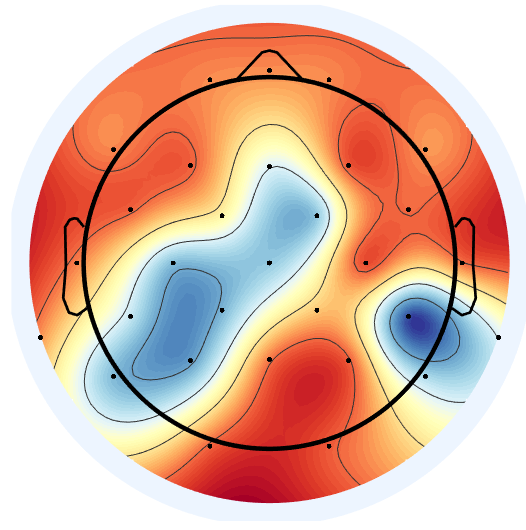

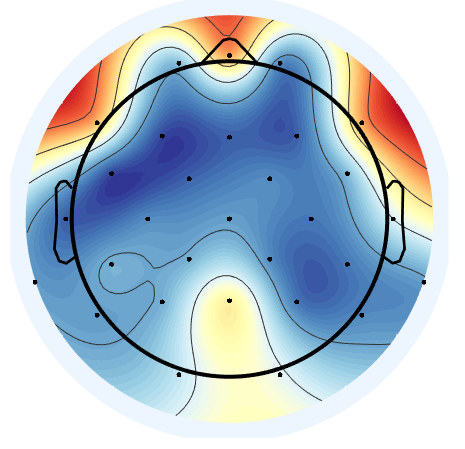

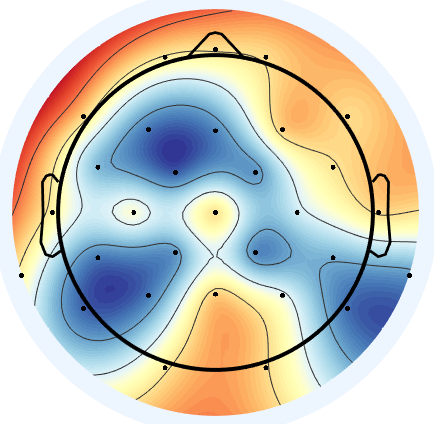

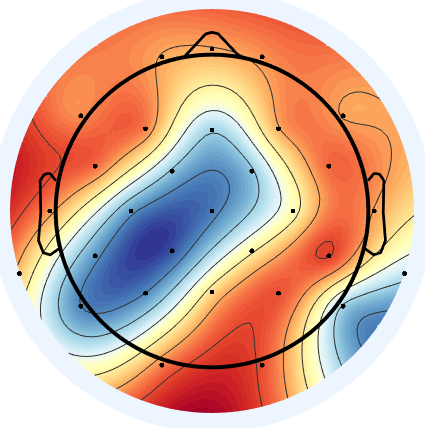

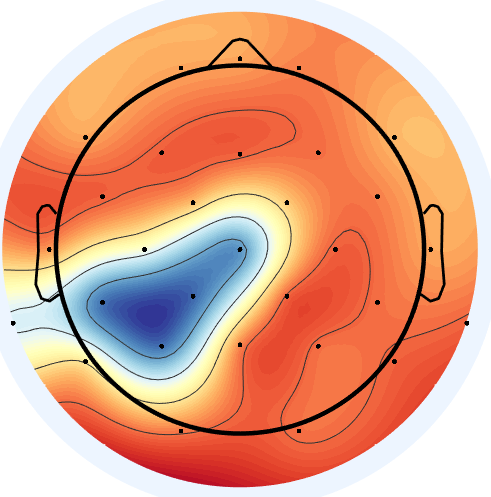

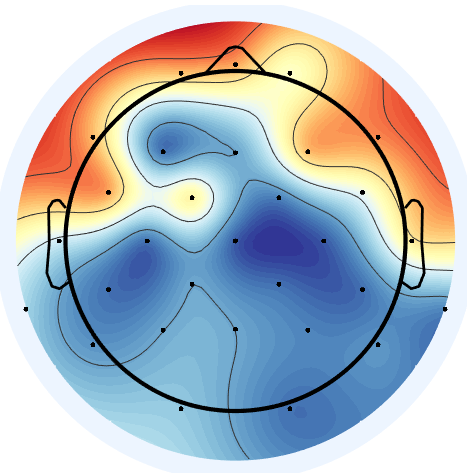

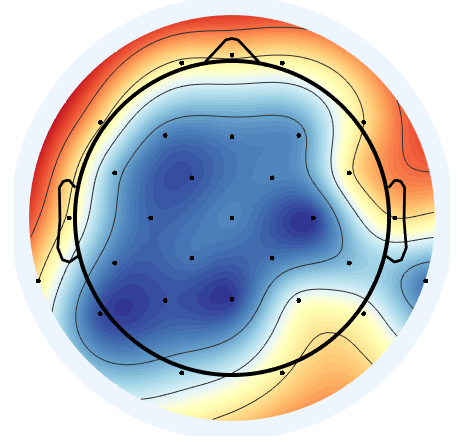

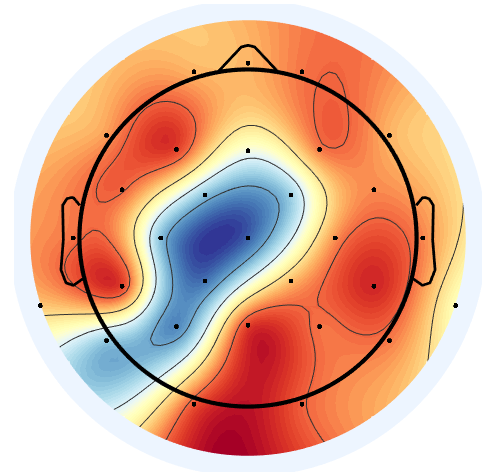

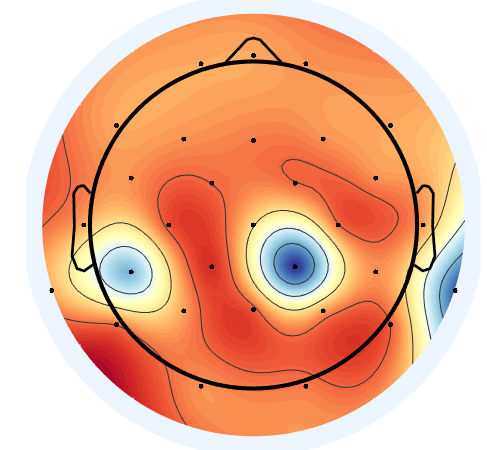


**Delta**

**Theta**

**Alpha**

**Beta**

**Moderate**

**Control**

**Mild**

**Severe**

**Figure B**. The distribution of the average absolute power for all SAD groups in different frequency bands ranging from 0 to 8.


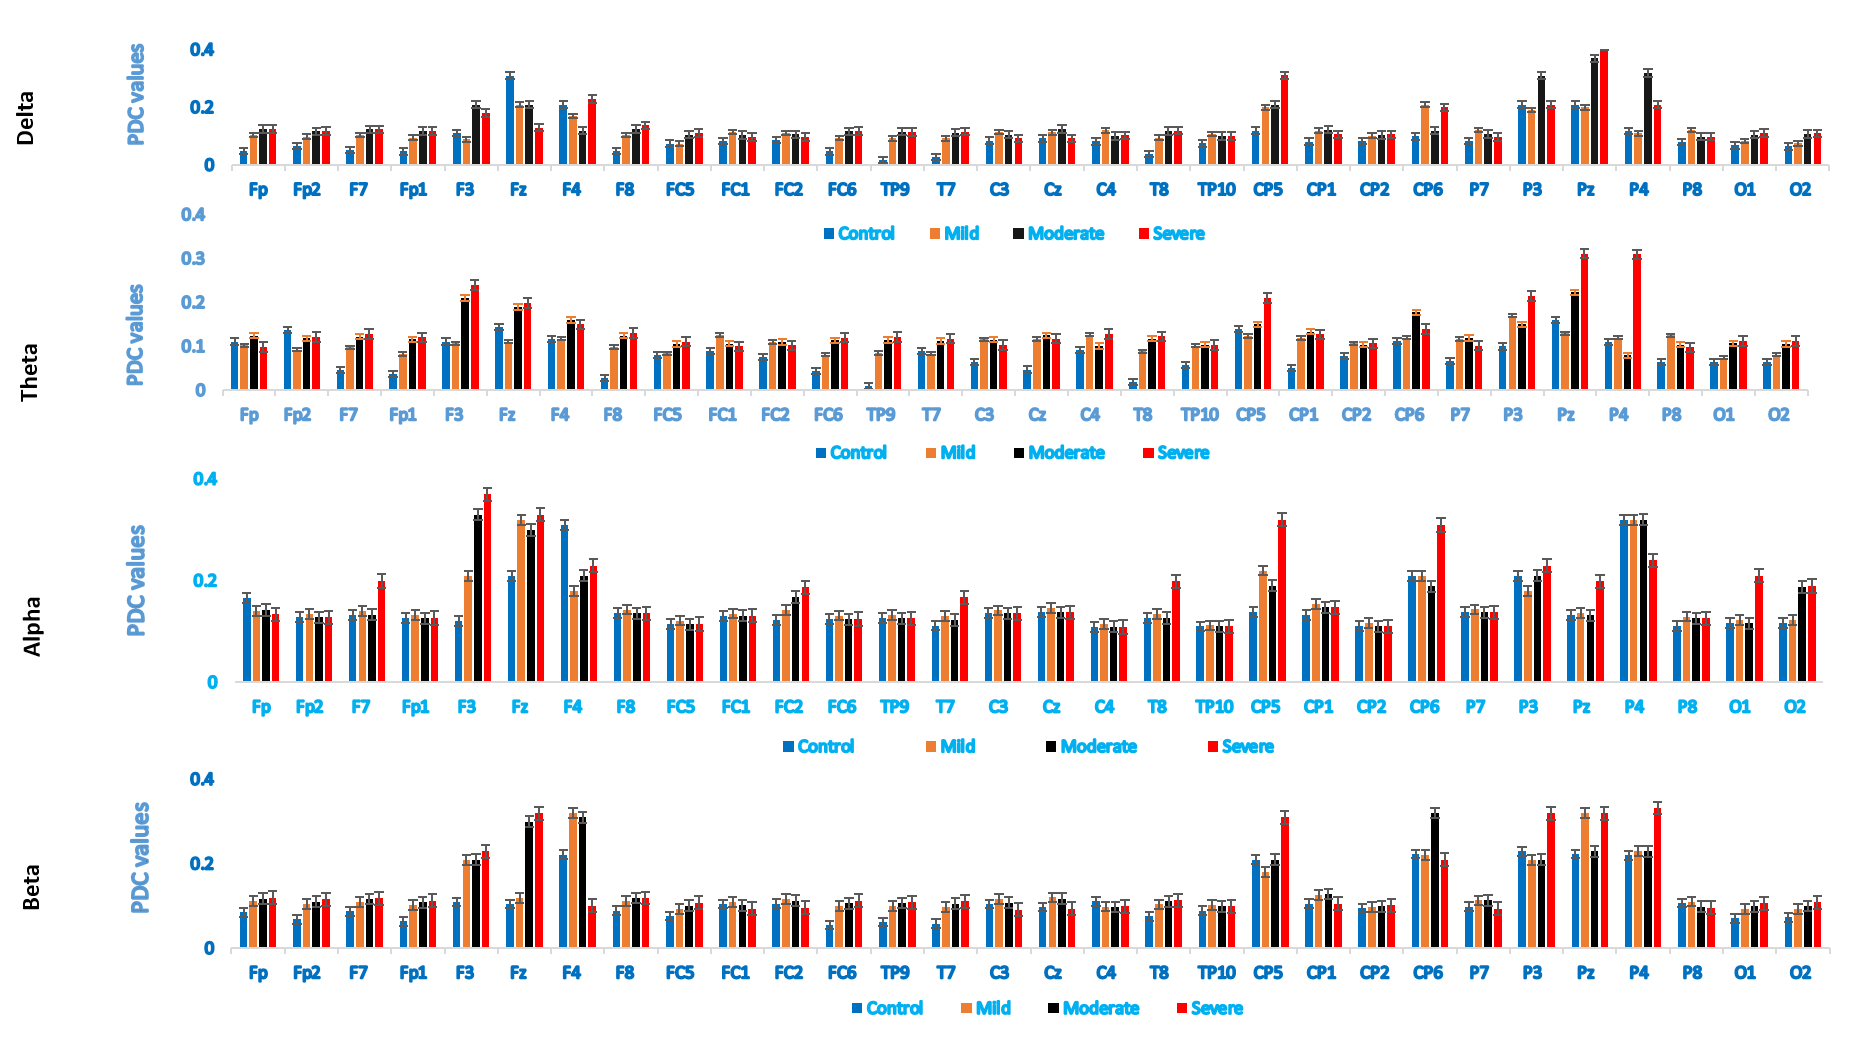


**Figure C**. Relationship between the average PDC values and the regional DMN areas in different frequency bands.


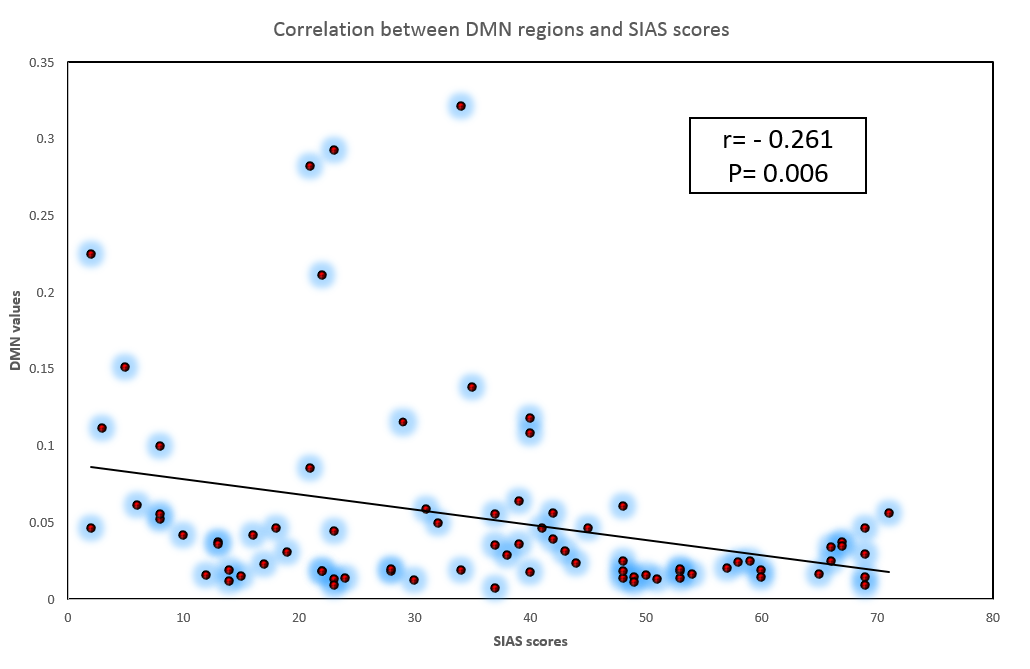


Figure D. Correlation between DMN values and SIAS scores without dividing patients into different SAD conditions.
